# Supplementary material for: Multimodal Imaging of Nanocomposite Microspheres for Transcatheter Intra-Arterial Drug Delivery to Liver Tumors
Source: PubMed Central journal article supplement (PMC4942792; doi:10.1038/srep29653), 2016-07-13
Supplement: srep29653-s1.pdf [file srep29653-s1.pdf]

## Supplementary Information

### Multimodal Imaging of Nanocomposite Microspheres for Transcatheter Intra-Arterial Drug Delivery to Liver Tumors

Dong-Hyun Kim<sup>a,b\*</sup>, Weiguo Li<sup>a</sup>, Jeane Chen<sup>a</sup>, Zhuoli Zhang<sup>a,b</sup>, Richard M Green<sup>c</sup>, Sui Huang<sup>b</sup>, Andrew Larson<sup>a,b,e,f,g</sup>

<sup>a</sup>Department of Radiology, Northwestern University Feinberg School of Medicine, Chicago, IL, USA

<sup>b</sup>Robert H. Lurie Comprehensive Cancer Center, Chicago, IL, USA

<sup>c</sup>Department of Cell and Molecular Biology, Northwestern University Feinberg School of Medicine Chicago, IL, USA

<sup>d</sup>Division of Hepatology, Northwestern University Feinberg School of Medicine Chicago, IL, USA

<sup>e</sup>Department of Electrical Engineering and Computer Science, Evanston, IL, USA

<sup>f</sup>Department of Biomedical Engineering, Northwestern University, Chicago, IL, USA

<sup>g</sup>International Institute of Nanotechnology (IIN), Northwestern University, Evanston, IL, USA

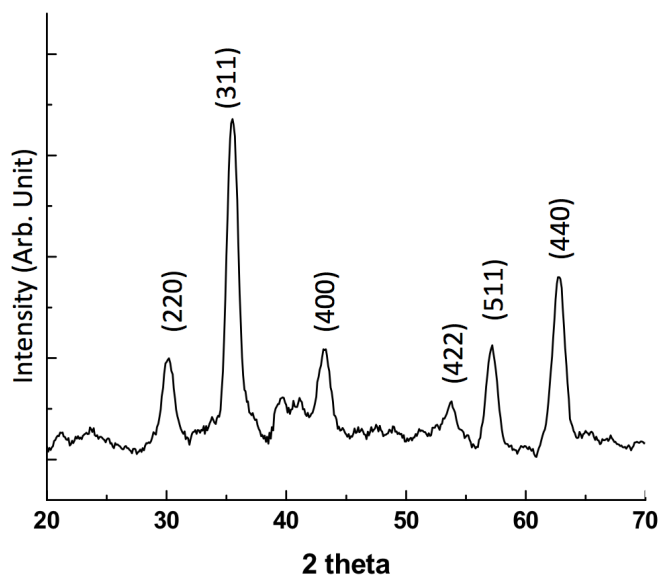

**Figure S1.** X-ray diffraction pattern of the synthesized magnetic clusters.

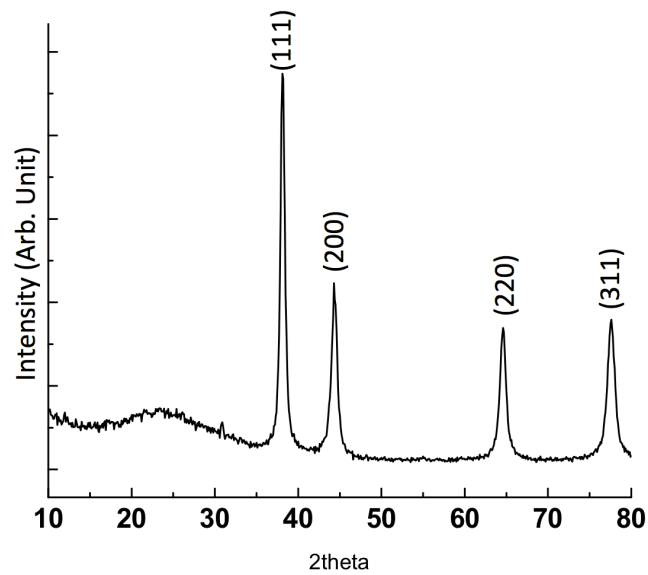

**Figure S2.** XRD pattern of the synthesized Au nanorods.

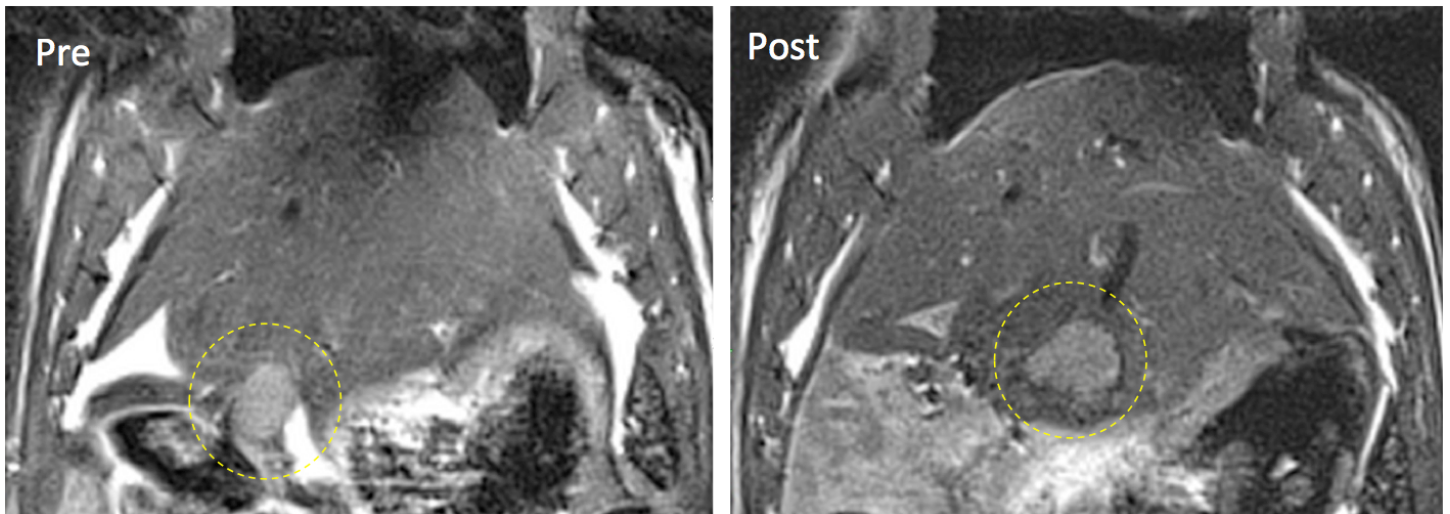

**Figure S3.** Additional  $T_2$ -weighted MRI acquired (a) before or (b) after transcatheter intra-arterial infusion of nanocomposite microspheres in McA-RH7777 rat HCC model. Note marked signal reduction at hypervascular tumor periphery upon intra-arterial delivery of the nanocomposite microspheres.

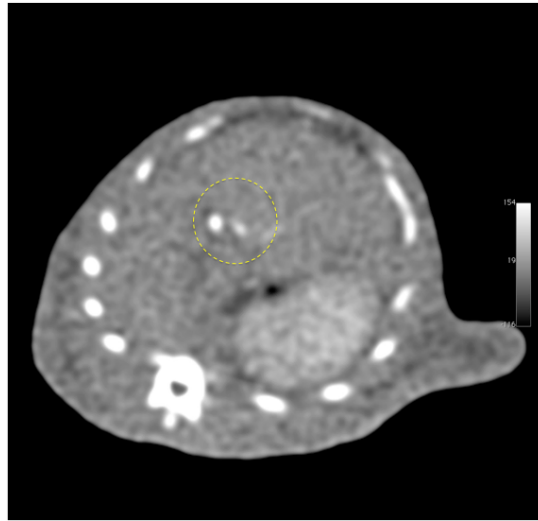

**Figure S4.** CT transversal image of rat after intra-arterial transcatheter infusion of nanocomposite microspheres in McA-RH7777 rat HCC models. Circles indicate regions with enhanced contrast within tumor region.
